# Supplementary material for: Socioeconomic determinants of access to safe abortion and experiences along the care trajectory: A survey of women with a five-year abortion history in Abuja and Lagos, Nigeria
Source: Research Square preprint supplement (doi:10.21203/rs.3.rs-5283631/v1), 2024-10-30
Supplement: Supplementary file 1 [file 6b8baf7ec4cb8cdaabadf68d.docx]

**Table 1: Demographic and reproductive history sample characteristics**

| **1a: Demographic Characteristics** | |  |  | **1b: Reproductive History Characteristics** | | | |
| --- | --- | --- | --- | --- | --- | --- | --- |
|  | **No.** | **% (Std.Err)** |  | |  | **No.** | **% (Std.Err)** |
| **Mean age** | **31.7** | **(0.53)** |  | | **Parity** |  |  |
| **Age** |  |  |  | | No children | 92 | 46.7% |
| **15-19** | 10 | 5.1% |  | | 1-2 children | 68 | 34.5% |
| **20-24** | 30 | 15.2% |  | | 3+ children | 37 | 18.8% |
| **25-29** | 40 | 20.3% |  | | **Abortions in past 5 years** |  |  |
| **30-34** | 46 | 23.4% |  | | 1 | 147 | 74.6% |
| **35-49** | 71 | 36.0% |  | | 2 | 35 | 17.8% |
| **Education** |  |  |  | | 3+ | 15 | 7.6% |
| **Primary** | 7 | 3.6% |  | | **Contraceptive use at abortion** |  |  |
| **Secondary** | 71 | 36.0% |  | | Non-use | 76 | 38.6% |
| **Higher** | 119 | 60.4% |  | | Use | 121 | 61.4% |
| **Marital status** |  |  |  | | **Type of FP used** |  |  |
| **Married / cohabiting** | 104 | 52.8% |  | | Sterilisation | 0 | 0.0% |
| **Divorced / separated / widowed** | 18 | 9.1% |  | | IUD | 1 | 0.8% |
| **Never married** | 75 | 38.1% |  | | Implant | 2 | 1.7% |
| **Religion** |  |  |  | | Injectable | 8 | 6.6% |
| **Christian** | 145 | 73.6% |  | | Oral contraceptive pills | 27 | 22.3% |
| **Islam** | 51 | 25.9% |  | | Emergency contraception | 37 | 30.6% |
| **No religion** | 1 | 0.5% |  | | Condoms | 27 | 22.3% |
| **Employment** |  |  |  | | Traditional methods | 19 | 15.7% |
| **Unemployed** | 24 | 12.2% |  | |  |  |  |
| **Employed** | 173 | 87.8% |  | |  |  |  |
| **Residence** |  |  |  | |  |  |  |
| **Urban** | 86 | 43.7% |  | |  |  |  |
| **Peri-urban** | 88 | 44.7% |  | |  |  |  |
| **Rural** | 23 | 11.7% |  | |  |  |  |
| **Study location** |  |  |  | |  |  |  |
| **Abuja** | 98 | 49.7% |  | |  |  |  |
| **Lagos** | 99 | 50.3% |  | |  |  |  |
| **MPI poor** |  |  |  | |  |  |  |
| **Not poor** | 133 | 67.5% |  | |  |  |  |
| **Poor** | 64 | 32.5% |  | |  |  |  |
| **MPI severe poor** |  |  |  | |  |  |  |
| **Not poor** | 170 | 86.3% |  | |  |  |  |
| **Severely poor** | **27** | **13.7%** |  | |  |  |  |

**Table 2: Safety characteristics of the abortion care accessed**

|  | **No.** | **%** |
| --- | --- | --- |
| **Method used** |  |  |
| **Non-recommended method** | 96 | 48.7% |
| **Recommended method - surgical** | 56 | 28.4% |
| **Recommend method - medical** | 45 | 22.8% |
| **Method source** |  |  |
| **Non-clinical** | 141 | 71.6% |
| **Clinical** | 56 | 28.4% |
| **Safety category** |  |  |
| Recommended method(s) involving only clinical source(s) | 44 | 22.3% |
| Recommended method involving non-clinical source(s) | 52 | 26.4% |
| Non-recommended method(s) involving clinical source(s) | **13** | **6.6%** |
| Non-recommended method(s) involving non-clinical source(s) | 88 | 44.7% |
| **Safe vs. least safe** |  |  |
| **Safer services (safety categories 1-3)** | 109 | 55.3% |
| **Least safe services (safety category 4)** | 88 | 44.7% |

**Table 3: Bivariate and multivariate regressions of characteristics associated with experiencing an unsafe abortion.**

| **3a: Demographic Characteristics** | |  |  |  |  |  |  |
| --- | --- | --- | --- | --- | --- | --- | --- |
|  | **OR** | **95% CI** | |  | **aOR** | **95% CI** | |
| **Age** |  |  |  |  |  |  |  |
| **15-19** | 1.00 |  |  |  |  |  |  |
| **20-24** | 1.00 | 0.23 | 4.31 |  |  |  |  |
| **25-29** | 0.36 | 0.09 | 1.49 |  |  |  |  |
| **30-35** | 0.67 | 0.17 | 2.68 |  |  |  |  |
| **35-49** | 0.41 | 0.11 | 1.58 |  |  |  |  |
| **Education** |  |  |  |  |  |  |  |
| **Primary** | 1.00 |  |  |  |  |  |  |
| **Secondary** | 0.97 | 0.20 | 4.65 |  |  |  |  |
| **Higher** | 0.44 | 0.09 | 2.06 |  |  |  |  |
| **Marital status** |  |  |  |  |  |  |  |
| **Married / cohabiting** | 1.00 |  |  |  |  |  |  |
| **Divorced / separated / widowed** | 1.48 | 0.54 | 4.03 |  |  |  |  |
| **Never married** | 1.44 | 0.79 | 2.62 |  |  |  |  |
| **Religion** |  |  |  |  |  |  |  |
| **Christian** | 1.00 |  |  |  |  |  |  |
| **Islam** | 1.39 | 0.73 | 2.64 |  |  |  |  |
| **No religion** | 1.00 |  |  |  |  |  |  |
| **Employment** |  |  |  |  |  |  |  |
| **Unemployed** | 1.00 |  |  |  |  |  |  |
| **Employed** | 0.53 | 0.22 | 1.27 |  |  |  |  |
| **Residence** |  |  |  |  |  |  |  |
| **Urban** | 1.00 |  |  |  | 1.00 |  |  |
| **Peri-urban** | **2.67** | **1.43** | **5.00** |  | **2.30** | **1.20** | **4.40** |
| **Rural** | **6.91** | **2.44** | **19.57** |  | **4.87** | **1.64** | **14.44** |
| **Study location** |  |  |  |  |  |  |  |
| **Abuja** | 1.00 |  |  |  | 1.00 |  |  |
| **Lagos** | 0.83 | 0.47 | 1.46 |  | 0.93 | 0.48 | 1.78 |
| **MPI poor** |  |  |  |  |  |  |  |
| **Not poor** | 1.00 |  |  |  | 1.00 |  |  |
| **Poor** | **2.20** | **1.20** | **4.04** |  | **2.08** | **1.08** | **4.00** |
| **MPI severe poor** |  |  |  |  |  |  |  |
| **Not poor** | 1.00 |  |  |  |  |  |  |
| **Severely poor** | **2.86** | **1.21** | **6.73** |  | ***2.42*** | ***0.94*** | ***6.20*** |
|  | |  |  |  |  |  |  |
| **3b: Reproductive History Characteristics** | |  |  |  |  |  |  |
|  | **OR** | **95% CI** | |  | **aOR** | **95% CI** | |
| **Parity** |  |  |  |  |  |  |  |
| No children | 1.00 |  |  |  |  |  |  |
| 1-2 children | 0.83 | 0.44 | 1.57 |  |  |  |  |
| 3+ children | 1.13 | 0.53 | 2.42 |  |  |  |  |
| **Previous abortions** |  |  |  |  |  |  |  |
| 1 | 1.00 |  |  |  |  |  |  |
| 2 | 0.73 | 0.34 | 1.55 |  |  |  |  |
| 3+ | 1.84 | 0.62 | 5.44 |  |  |  |  |
| **Any FP use** |  |  |  |  |  |  |  |
| No | 1.00 |  |  |  | 1.00 |  |  |
| Yes | **0.50** | **0.28** | **0.89** |  | **0.51** | **0.26** | **0.99** |

Bold values indicate statistical significance at the p<0.05 level.

Bold italicised values indicate statistical significance at the p<0.01)

OR, Odds ratio; aOR, Adjusted odds ratio

**Table 4: Frequencies of experiences along the abortion care pathway**

|  | **No.** | **%** |
| --- | --- | --- |
| **Used any pregnancy test / medical examination** |  |  |
| **No** | 50 | 25.4% |
| **Yes** | 147 | 74.6% |
| **Role in decision making to terminate pregnancy** |  |  |
| **Joint decision** | 99 | 50.3% |
| **Mainly husband / partner’s decision** | 15 | 7.6% |
| **Mainly respondent’s decision** | 79 | 40.1% |
| **Someone else’s decision** | 4 | 2.0% |
| **Least safe method used** |  |  |
| Surgical procedure | 56 | 28.4% |
| Medical procedure | 44 | 22.3% |
| Other pills | 37 | 18.8% |
| Traditional / other methods | 59 | 29.9% |
| **Least safe source of method accessed** |  |  |
| **Public facility** | 0 | 0.0% |
| **Private facility** | 56 | 28.4% |
| **Pharmacy / chemist shops** | 39 | 19.8% |
| **Traditional / other non-medical** | 102 | 51.8% |
| **Able to access preferred source** |  |  |
| **No** | 56 | 28.4% |
| **Yes** | 125 | 63.5% |
| **Experienced any complications** |  |  |
| **No** | 176 | 89.3% |
| **Yes** | 21 | 10.7% |
| **Had social support available for advice on abortion** |  |  |
| **No** | 65 | 33.0% |
| **Yes** | 132 | 67.0% |

**Table 5: Bivariate and multivariate regressions of characteristics associated with experiences along the abortion care journey.**

***Table 5a: Pre-service experiences***

|  | ***Used a pregnancy test or other medical examination*** | | | | | | ***Was the sole decision maker*** | | | | |
| --- | --- | --- | --- | --- | --- | --- | --- | --- | --- | --- | --- |
|  | OR | 95% CI | | aOR | 95%CI | | OR | 95% CI | | aOR |  |
| **Marital status** |  |  |  |  |  |  |  |  |  |  |  |
| Currently married/cohabiting | 1.00 |  |  |  |  |  | 1.00 |  |  | 1 |  |
| Divorced or separated/widowed | 0.96 | 0.31 | 2.93 |  |  |  | **21.71** | **4.69** | **100.53** | **36.55** | **191.79** |
| Never Married | 1.26 | 0.63 | 2.51 |  |  |  | **2.38** | **1.27** | **4.45** | **2.86** | **5.65** |
| **Religion** |  |  |  |  |  |  |  |  |  |  |  |
| Christian | 1.00 |  |  |  |  |  | 1.00 |  |  |  |  |
| Islam | 0.87 | 0.42 | 1.80 |  |  |  | 1.34 | 0.70 | 2.56 |  |  |
| No religion | 1.00 |  |  |  |  |  | 1.00 |  |  |  |  |
| **Residence*** |  |  |  |  |  |  |  |  |  |  |  |
| Urban | 1.00 |  |  | 1.00 |  |  | 1.00 |  |  |  |  |
| Peri-urban | **2.88** | **1.42** | **5.85** | **4.34** | **1.91** | **9.85** | 0.63 | 0.34 | 1.15 |  |  |
| Rural | **3.95** | **1.09** | **14.35** | **8.84** | **2.05** | **38.09** | 0.61 | 0.24 | 1.60 |  |  |
| **Study location** |  |  |  |  |  |  |  |  |  |  |  |
| Abuja | 1.00 |  |  | 1.00 |  |  | 1.00 |  |  | 1.00 |  |
| Lagos | **2.76** | **1.40** | **5.43** | **4.68** | **2.01** | **10.87** | ***1.71*** | ***0.96*** | ***3.04*** | **2.97** | **6.03** |
| **MPI poor** |  |  |  |  |  |  |  |  |  |  |  |
| Not poor | 1.00 |  |  | 1.00 |  |  | 1.00 |  |  |  |  |
| Poor | ***0.57*** | ***0.29*** | ***1.11*** | 0.54 | 0.24 | 1.17 | 0.94 | 0.51 | 1.73 |  |  |
| **MPI severely poor** |  |  |  |  |  |  |  |  |  |  |  |
| Not poor | 1.00 |  |  |  |  |  | 1.00 |  |  |  |  |
| Severely poor | 0.64 | 0.27 | 1.52 |  |  |  | 0.86 | 0.37 | 1.99 |  |  |
| **Previous abortions** |  |  |  |  |  |  |  |  |  |  |  |
| 1 | 1.00 |  |  |  |  |  | 1.00 |  |  |  |  |
| 2 | 0.90 | 0.40 | 2.05 |  |  |  | 1.18 | 0.56 | 2.50 |  |  |
| 3+ | 5.06 | 0.64 | 39.73 |  |  |  | 1.38 | 0.48 | 4.02 |  |  |
| **Previous FP use** |  |  |  |  |  |  |  |  |  |  |  |
| No | 1.00 |  |  | 1.00 | 0.36 | 1.82 | 1.00 |  |  | 1.00 |  |
| Yes | **0.47** | **0.23** | **0.95** | 0.81 | 0.53 | 4.30 | **2.19** | **1.19** | **4.03** | **4.05** | **8.66** |

***Table 5b: During service experiences***

|  | ***Used an approved medical or surgical method*** | | | | | | ***Used a clinical source*** | | | | | | ***Accessed preferred source of abortion method used*** | | | | | |
| --- | --- | --- | --- | --- | --- | --- | --- | --- | --- | --- | --- | --- | --- | --- | --- | --- | --- | --- |
|  | OR | 95% CI | | aOR | 95%CI | | OR | 95% CI | | aOR | 95%CI | | OR | 95% CI | | aOR | 95%CI | |
| **Marital status** |  |  |  |  |  |  |  |  |  |  |  |  |  |  |  |  |  |  |
| Currently married/cohabiting | 1.00 |  |  |  |  |  | 1.00 |  |  |  |  |  | 1.00 |  |  |  |  |  |
| Divorced or separated/widowed | 0.61 | 0.22 | 1.67 |  |  |  | 0.49 | 0.13 | 1.83 |  |  |  | 0.59 | 0.19 | 1.81 |  |  |  |
| Never Married | 0.63 | 0.35 | 1.15 |  |  |  | 1.09 | 0.57 | 2.09 |  |  |  | 0.80 | 0.41 | 1.56 |  |  |  |
| **Religion** |  |  |  |  |  |  |  |  |  |  |  |  |  |  |  |  |  |  |
| Christian | 1.00 |  |  |  |  |  | 1.00 |  |  |  |  |  | 1.00 |  |  |  |  |  |
| Islam | 0.81 | 0.43 | 1.53 |  |  |  | 0.52 | 0.24 | 1.14 |  |  |  | 0.92 | 0.45 | 1.88 |  |  |  |
| No religion | 1.00 |  |  |  |  |  | 1.00 |  |  |  |  |  | 1.00 |  |  |  |  |  |
| **Residence*** |  |  |  |  |  |  |  |  |  |  |  |  |  |  |  |  |  |  |
| Urban | 1.00 |  |  | 1.00 |  |  | 1.00 |  |  |  |  |  | 1.00 |  |  | 1.00 |  |  |
| Peri-urban | **0.31** | **0.17** | **0.58** | **0.32** | **0.17** | **0.63** | 0.97 | 0.51 | 1.85 |  |  |  | **2.03** | **1.04** | **3.99** | **2.19** | **1.09** | **4.42** |
| Rural | **0.04** | **0.01** | **0.18** | **0.04** | **0.01** | **0.23** | 0.49 | 0.15 | 1.57 |  |  |  | ***3.10*** | ***0.96*** | ***10.05*** | **4.15** | **1.21** | **14.24** |
| **Study location** |  |  |  |  |  |  |  |  |  |  |  |  |  |  |  |  |  |  |
| Abuja | 1.00 |  |  | 1.00 |  |  | 1.00 |  |  | 1.00 |  |  | 1.00 |  |  | 1.00 |  |  |
| Lagos | 0.87 | 0.50 | 1.52 | 0.61 | 0.31 | 1.21 | 1.47 | 0.79 | 2.75 | 1.28 | 0.68 | 2.43 | 0.87 | 0.46 | 1.63 | 0.73 | 0.37 | 1.45 |
| **MPI poor** |  |  |  |  |  |  |  |  |  |  |  |  |  |  |  |  |  |  |
| Not poor | 1.00 |  |  |  |  |  | 1.00 |  |  | 1.00 |  |  | 1.00 |  |  | 1.00 |  |  |
| Poor | 0.64 | 0.35 | 1.17 |  |  |  | **0.41** | **0.19** | **0.85** | **0.43** | **0.20** | **0.91** | **0.40** | **0.20** | **0.77** | **0.31** | **0.15** | **0.63** |
| **MPI severely poor** |  |  |  |  |  |  |  |  |  |  |  |  |  |  |  |  |  |  |
| Not poor | 1.00 |  |  | 1.00 |  |  | 1.00 |  |  |  |  |  | 1.00 |  |  |  |  |  |
| Severely poor | **0.42** | **0.18** | **1.00** | 0.63 | 0.22 | 1.77 | 0.53 | 0.19 | 1.48 |  |  |  | 0.88 | 0.35 | 2.20 |  |  |  |
| **Previous abortions** |  |  |  |  |  |  |  |  |  |  |  |  |  |  |  |  |  |  |
| 1 | 1.00 |  |  |  |  |  | 1.00 |  |  |  |  |  | 1.00 |  |  |  |  |  |
| 2 | 1.14 | 0.54 | 2.39 |  |  |  | 1.23 | 0.55 | 2.73 |  |  |  | 1.67 | 0.67 | 4.16 |  |  |  |
| 3+ | 0.84 | 0.29 | 2.44 |  |  |  | 1.34 | 0.43 | 4.15 |  |  |  | 0.62 | 0.20 | 1.91 |  |  |  |
| **Previous FP use** |  |  |  |  |  |  |  |  |  |  |  |  |  |  |  |  |  |  |
| No | 1.00 |  |  | 1.00 |  |  | 1.00 |  |  |  |  |  | 1.00 |  |  |  |  |  |
| Yes | ***1.67*** | ***0.94*** | ***2.98*** | 1.22 | 0.62 | 2.41 | 1.19 | 0.62 | 2.25 |  |  |  | 0.75 | 0.39 | 1.45 |  |  |  |

***Table 5c: Post service experiences***

|  | ***Experienced any complications*** | | | | | | ***Had social support available for advice on abortion*** | | | | | |
| --- | --- | --- | --- | --- | --- | --- | --- | --- | --- | --- | --- | --- |
|  | OR | 95% CI | | aOR | 95%CI | | OR | 95% CI | | aOR | 95%CI | |
| **Marital status** |  |  |  |  |  |  |  |  |  |  |  |  |
| Currently married/cohabiting | 1.00 |  |  | 1.00 |  |  | 1.00 |  |  |  |  |  |
| Divorced or separated/widowed | **5.28** | **1.60** | **17.43** | **6.55** | **1.684098** | **25.45449** | 0.80 | 0.28 | 2.24 |  |  |  |
| Never Married | 0.92 | 0.31 | 2.70 | 0.43 | 0.06 | 3.08 | 1.15 | 0.61 | 2.17 |  |  |  |
| **Religion** |  |  |  |  |  |  |  |  |  |  |  |  |
| Christian | 1.00 |  |  | 1.00 |  |  | 1.00 |  |  |  |  |  |
| Islam | **2.97** | **1.18** | **7.49** | 1.92 | 0.66 | 5.63 | 1.12 | 0.56 | 2.21 |  |  |  |
| No religion | 1.00 |  |  |  |  |  | 1.00 |  |  |  |  |  |
| **Residence*** |  |  |  |  |  |  |  |  |  |  |  |  |
| Urban | 1.00 |  |  |  |  |  | 1.00 |  |  | 1.00 |  |  |
| Peri-urban | 2.34 | 0.69 | 7.89 |  |  |  | **2.53** | **1.32** | **4.83** | **2.11** | **1.03** | **4.34** |
| Rural | 10.93 | 2.92 | 40.94 |  |  |  | 2.24 | 0.81 | 6.24 | 2.49 | 0.77 | 8.06 |
| **Study location** |  |  |  |  |  |  |  |  |  |  |  |  |
| Abuja | 1.00 |  |  | 1.00 |  |  | 1.00 |  |  | 1.00 |  |  |
| Lagos | 1.10 | 0.44 | 2.72 | 1.66 | 0.53 | 5.17 | 1.06 | 0.59 | 1.93 | 0.78 | 0.38 | 1.62 |
| **MPI poor** |  |  |  |  |  |  |  |  |  |  |  |  |
| Not poor | 1.00 |  |  | 1.00 |  |  | 1.00 |  |  |  |  |  |
| Poor | **2.55** | **1.02** | **6.37** | 1.01 | 0.23 | 4.39 | 1.01 | 0.54 | 1.91 |  |  |  |
| **MPI severely poor** |  |  |  |  |  |  |  |  |  |  |  |  |
| Not poor | 1.00 |  |  | 1.00 |  |  | 1.00 |  |  |  |  |  |
| Severely poor | **5.09** | **1.87** | **13.84** | **6.96** | **1.29** | **37.62** | 0.98 | 0.42 | 2.33 |  |  |  |
| **Previous abortions** |  |  |  |  |  |  |  |  |  |  |  |  |
| 1 | 1.00 |  |  |  |  |  | 1.00 |  |  | 1.00 |  |  |
| 2 | 0.83 | 0.23 | 3.02 |  |  |  | **0.20** | **0.09** | **0.43** | **0.20** | **0.08** | **0.47** |
| 3+ | 2.20 | 0.56 | 8.69 |  |  |  | 0.50 | 0.17 | 1.51 | 0.39 | 0.12 | 1.28 |
| **Previous FP use** |  |  |  |  |  |  |  |  |  |  |  |  |
| No | 1.00 |  |  |  |  |  | 1.00 |  |  | 1.00 |  |  |
| Yes | 0.66 | 0.27 | 1.64 |  |  |  | **0.31** | **0.16** | **0.61** | **0.28** | **0.13** | **0.61** |

***Bold values indicate statistical significance at the p<0.05 level.***

***Bold italicised values indicate statistical significance at the p<0.01)***

***OR, Odds ratio; aOR, Adjusted odds ratio.***

## Discussion

### Abortion care safety

This study describes the frequency of unsafe abortions in Lagos and Abuja, Nigeria and provides new insights into the sociodemographic correlates with women’s experiences along their abortion care trajectory. Almost half of the abortions (44.7%) in our sample were unsafe, with those living in rural areas and those living in poverty at the greatest risk of having unsafe abortions. Previous use of family planning was a protective factor, with those who reported any use of family planning at the time of their most recent pregnancy that was terminated having a decreased likelihood of having an unsafe abortion. These findings are consistent with previous literature suggesting that the most disadvantaged women are those most likely to resort to unsafe means of termination (13; 6; 14; 15; 16). While, like previous evidence, we found that already vulnerable and disadvantaged women were most like to experience unsafe abortion, specifically those living in rural areas and those living in poverty, other sociodemographic factors that have been found to be associated with unsafe abortion, including being younger, unmarried, and uneducated women were not in our sample. This could be due to various factors, including a limited sample size to have the necessary power to detect the association and a sample that was skewed towards older and more affluent women due to the peer-to-peer recruitment approach.

Our estimate of the proportion of unsafe abortions was also lower than the previous estimate of 63.4% in 2017 (and 73.7% from the same study for the past five years) (6). These 2017 estimates are also lower than the unsafe abortion estimates for Western Africa in 2010–2014 at 84.7% (12). This could be due to various reasons including that our sample may not be representative of the national population of women who access abortions and is likely biased towards a more affluent population. The potential bias in our sample is due to the sampling process whereby providers linked interviewers to women who had received abortion care from them. Such women are likely to have received safer care involving clinic-based providers which may not be representative of the care for the general population. However, this estimate may also be capturing that abortion is becoming safer in Nigeria.

It is probable that safe abortion options are becoming more available in Nigeria, largely due to the increased availability of medication abortion drugs (Mifepristone and Misoprostol) in recent years. Mifepristone was registered for use in 2017 and Misoprostol has been on the country’s Essential Medicines List for incomplete and spontaneous abortion since 2010 (13). A 2018 review of referral hospital medical record data showed an increase in Misoprostol use for induced abortions over a nine-year study period, and this was associated with a reduction in severe morbidity (14). Other studies have indicated that women increasingly have the option to self-manage their abortion by purchasing the drugs through pharmacies, chemist shops, abortion hotlines and accompaniment models (15) (16). This trend toward out-of-facility medical management of abortion appears to have been captured in our study as well, with 26.4% of respondents reporting using recommended methods (medical abortion) from non-clinical sources, compared to just 5.4% in 2017 (10). We also observed a decrease in the use of recommended method(s) involving only clinical source(s) compared to the 2017 data, at 22.3% versus 29.1% (10). This indicates that while the overall safety of abortion may be improving, there has been a shift away from clinical sources of abortion which may mean future gaps in needed access to clinical care for surgical options and management of complications. The apparent shift away from clinical sources captured in this study may also reflect more recent effort to train pharmacist to provide safer medication abortion (21; 22).

### Experiences along the abortion care trajectory

Women’s decisions regarding where to seek abortion care, the method(s) and source(s) that they eventually use, the quality of care they receive, and their access to or use of any follow-up care are influenced by a number of factors. Coast et al. developed a comprehensive framework that encompasses the full range of factors that shape women’s abortion care-seeking trajectories, which includes the abortion-specific context, women’s individual context, and the international or sub-national context (17). Previous evidence from the Nigerian context found that non-clinical providers (55.0%) were more often used than clinical providers (45.0%); however, clinical providers were preferred by most women (55.6%) (18). While, we found a lower use of clinical sources (28.4%), we saw a similar trend in preference for clinical providers, with 90.7% of those who accessed a clinical source reporting that they had accessed their preferred source compared to just 59.8% of those who had accessed non-clinical sources. We also found that those who were living in poverty had a significantly decreased likelihood of accessing their preferred source and accessing a clinical source, indicating important wealth inequities in ability to exercise choice in source of abortion and importantly in access to facility-based care. We also found that women living in poverty and severe poverty were significantly more likely to have experienced any complications (MPI poor OR: 2.55, 95% CI:1.02-6.37; MPI severe poor OR: 5.09, 95% ci: 1.87-13.84). When adjusting for other demographic covariates, severe poverty remained significantly associated with experiencing any complications, demonstrating the public health imperative of ensuring improved equitable access to safe – with options for both facility and out-of-facility - sources of care.

### Limitations and strengths of the study

Our study has some limitations. First, we relied on women’s self-reporting of their abortion experiences in a social context where such information is highly sensitive and in a legal context where one can be prosecuted for securing abortion. Self-reporting under such circumstances could introduce social desirability bias, leading to underreporting or misreporting experiences. Previous studies have highlighted the challenge of underreporting and misreporting of abortion (25). Apart from the information being sensitive, laypeople may be unable to accurately report medical information. Further to social desirability bias, recall bias, introduced because of the study's retrospective nature, could also limit the reliability of the results; it is realistically challenging for women and girls to recall with exactitude the experiences that may have happened in the past five years.

The second limitation relates to the sample and sampling approach. Our sample of 197 may not be representative of the broader population of women who have had abortions in Abuja and Lagos, let alone Nigeria. We also used a peer-to-peer sampling approach which may create an underrepresentation of certain demographic groups or an overrepresentation of well-connected individuals, affecting the generalizability of the findings. To further compound this limitation, we identified the seed samples from facility-based providers, who are likely to have introduced the research team to women likely to receive care from formal healthcare settings.

Notwithstanding the limitations discussed, this study has significant strengths. Our utilization of a respondent-driven sampling approach ensured the resulting sample included women who received abortions from a wide spectrum of sources and providers, thereby capturing a broad range of abortion services and experiences. This approach allowed us to capture women who received services from formal and informal providers, highlighting service characteristics outside the formal health sector and comparing the varied sources and experiences. Further, the study examined abortion safety based on the WHO guidelines and examined the method(s) used and the outcomes of abortion care (4). This study provides valuable contributions by categorizing abortions into safety categories and assessing the determinants of safe abortion practices to highlight necessary programmatic intervention for improvement in quality of care and improved health outcomes. Finally, the sociodemographic characteristics and reproductive histories of respondents explored in this study provide an understanding of disparities in access to safe abortion care and the resulting health outcomes. This allows us to situate access to abortion as socially determined, especially based on social status and income.

## Conclusions

Our study suggests that while the overall safety of abortion could have marginally improved over the last five years, still almost half of abortions in Lagos and Nigeria in our study were the most unsafe, with the use of non-recommended methods outside of a clinical setting. Our findings further indicate that economically disadvantaged women living in rural areas with limited ability to navigate and access safe abortion in this legally restrictive setting are most at risk of having an unsafe abortion, clearly highlighting that abortion in Nigeria is a public health concern and an issue of social inequity. Efforts to expand the legal conditions for abortion in Nigeria are critical. Previous evidence has shown that restrictive abortion laws negatively impact abortion safety without reducing overall abortion incidence rates (12). In the absence of legal expansion, women will continue to seek services from providers who are not regulated and may not have appropriate training but are motivated to provide abortion for financial gain and/or to alleviate suffering associated with unwanted pregnancies or seek sub-quality products to self-manage their abortion. In the meantime, harm reduction efforts to increase awareness of quality MA drugs to self-induce more safely and/or train lower cadre providers on medical management of abortion can help mitigate the toll of abortion-related morbidity and mortality.

Additionally, improved availability of contraceptive services, including counselling to counteract fears of contraceptive-related infertility, is needed to reduce women’s reliance on unsafe abortion alone to control their fertility. We found that previous use of family planning was associated with a decreased likelihood of having an unsafe abortion. This could be due to various factors such as an established, trusted connection to the health care system and specifically a sexual and reproductive health provider and thus improved access to information and knowledge about where to access a safe abortion care service.

Furthermore, expanded availability of quality, facility-based services including surgical abortion and PAC is critically needed to reduce abortion-related morbidity and mortality given the frequent recourse to unsafe abortion. Given the existing inequities in access to these services, it is essential that any future efforts focused on improving access to safe abortion services prioritise mitigating these gaps in access to ensure that already disadvantaged women and populations do not continue to be left behind.

## List of abbreviations

| **D&C** | Dilation and curettage |
| --- | --- |
| **EVA** | Electric Vacuum Aspiration |
| **IRB** | Institutional Review Board |
| **MA** | Medication abortion |
| **MVA** | Manual Vacuum Aspiration |
| **PAC** | Post-abortion care |
| **SAC** | Safe abortion care |
| **SRH** | Sexual and Reproductive Health |
| **SRHR** | Sexual and Reproductive Health and Rights |
| **TMA** | Total Market Approach |
| **WHO** | World Health Organisation |

## Declarations

### Ethical approval and consent to participate.

This study protocol was approved by MSI’s Ethical Review Board as part of MSI's larger study entitled “A total market assessment for safe abortion and post-abortion care in Abuja & Lagos, Nigeria” with application reference number 003-23. Further IRB approvals were sought and received from the Federal Capital Territory Health Research Ethics Committee in Abuja (approval number: FHREC/2023/01/136/25-07-23) and the Lagos State University Teaching Hospital Health Research Ethics Committee (approval number: LREC/06/10/2210.

Informed consent to participate was obtained from all participants.

### Consent for publication

Informed consent was obtained from all participants for data to be shared in publication.

### Availability of data and materials

The datasets used and/or analysed during the current study are available from the corresponding author upon reasonable request.

### Competing interests

The authors have no conflicts of interest.

### Funding

The development of the study design, protocol and ethical review was supported by a large anonymous donor.

### Authors’ contributions

MR led the study design, supported the development of the study protocol and data collection tools, led the analysis, interpretation, and drafted the manuscript.

AT contributed to the conception and design of the study, provided oversight to data collection training, and contributed to the interpretation of data, and contributed to the manuscript.

BU and AA contributed to the study design, led the development of the protocol and data collection tools, supported the tool scripting, testing, and surveyor training, supervised data collection, contributed to the analysis and interpretation, and substantially contributed to the manuscript.

All authors read and approved the final manuscript.

### Acknowledgements

The authors would like to knowledge and thank the contribution of the team of data collectors and research assistants who made this study possible, as well as all the study respondents who gave their time to participate in this study and share their experience with us.

## References

1. *Global, regional, and national levels and causes of maternal mortality during 1990–2013: a systematic analysis for the Global Burden of Disease Study.* **Kassebaum NJ, Bertozzi-Villa A, Coggeshall MS, Shackelford KA, Steiner C, Heuton KR.** 2013, Lancet, pp. 2014;384(9947):980–1004.

2. *Unintended pregnancy and abortion by income, region, and the legal status of abortion: estimates from a comprehensive model for 1990–2019.* **Bearak J, Popinchalk A, Ganatra B, Moller AB, Tunçalp Ö, Beavin C, et al.** 2020, Lancet Glob Health, pp. 8(9):e1152–61.

3. **CRR, Center for Reproductive Rights.** The World’s Abortion Laws. [Online] 2024. [Cited: 01 June 2024.] https://reproductiverights.org/maps/worlds-abortion-laws/.

4. **WHO, World Health Organisation.** Abortion care guideline. [Online] 2022. [Cited: ] https://www.who.int/publications/i/item/9789240039483.

5. **WHO.** *Global Abortion Policies Database.* Human Reproduction Programme - Research for impact. . Geneva : Countries Archive, 2018.

6. **United Nations, Department of Economic and Social Affairs, Population Division.** *World Population Prospects 2024, Online Edition.* 2024.

7. *The incidence of abortion in Nigeria.* **Bankole, A, et al.** 2015, Int Perspect Sex Reprod Health, pp. 41:170–81.doi:10.1363.

8. *The incidence of induced abortion in Nigeria.* **Henshaw SK, Singh S, Oye-Adeniran BA, et al.** 1998, Int Fam Plan Perspect, pp. 24:156–64.

9. **iAHO.** *Maternal mortality: The urgency of systemic and multisectoral approach in mitigating maternal deaths in Africa.* s.l. : World Health Organisation (WHO), 2023. Analytical Fact Sheet.

10. *Inequities in the incidence and safety of abortion in Nigeria.* **Bell S.O., Omoluabi E, OlaOlorun F, Shankar M, Moreau C, et al.** 2020, BML Glob Health, p. e001814.

11. **OPHI, Oxford Poverty & Human Development Initiative.** The global Multidimensional Poverty Index. [Online] 2023. [Cited: 01 June 2024.] https://ophi.org.uk/global-mpi.

12. *Global, regional, and subregional classification of abortions by safety, 2010–14: estimates from a Bayesian hierarchical model.* **Ganatra B, Gerdts C, Rossier C, Johnson, BR, Tuncalp O, Assifi A, et al.** 2017, The Lancet, pp. 390:2372-81.

13. **IPPF.** Medical Abortion Commodities Database. *medab.* [Online] 2023. [Cited: 03 June 2024.] https://medab.org/.

14. *Bello FA, Fawole B, Oluborode B, Awowole I, Irinyenikan T, Awonuga D, et al.* **Bello FA, Fawole B, Oluborode B, Awowole I, Irinyenikan T, Awonuga D, et al.** 2018, Plos ONE, p. 13(12).

15. *Self-managed medication abortion outcomes: results from a prospective pilot study.* **Moseson H, Jayaweera R, Raifman S, Keefe-Oates B, Filippa S, Motana R, et al.** 2020, Reprod Health, p. 17(1):164.

16. *Women’s self-reported experiences using misoprostol obtained from drug sellers: a prospective cohort study in Lagos State, Nigeria.* **Stillman M, Owolabi O, Fatusi AO, Akinyemi AI, Berry AL, Erinfolami TP, et al.** 2020, BMJ Open, p. 10(5).

17. *Trajectories of women’s abortion-related care: a conceptual framework. .* **Coast E, Norris AH, Moore AM, Freeman E.** 2018, Soc Sci Med, pp. 200:199–210.

18. *Determinants of women’s preferred and actual abortion provision locations in Nigeria.* **Byrne, M.E., Omoluabi, E., OlaOlorun, F.M. et al.** 2021, Reprod Health, pp. 18, 240.

19. *Global causes of maternal death: a WHO systematic analysis.* **Say L, Chou D, Gemmill A, Tuncalp Ö, Moller AB, Daniels J, et al.** 2014, Lancet Glob Health, pp. ;2(6):e323–33.

20. *Measurement of abortion safety using community-based surveys: findings from three countries.* **Bell SO, Ola0lorun F, Shankar M, Ahmad D, Guiella G, Omoluabi E, et al.** 2019, PLoS ONE, p. 14(11).

21. **National Population Commission, NPC.** *Nigeria Demographic and Health Survey 2018.* Abuja, Nigeria and Rockville, Maryland : NPC and ICF International, 2019.

22. *Abortion worldwide 2017: uneven progress and unequal access.* **Singh S, Remez L, Sedgh G, Kwok L, Onda T.** 2018, Guttmacher.

23. *Maternal near-miss due to unsafe abortion and associated short-term health and socio-economic consequences in Nigeria.* **Prada E, Bankole A, Onda T, Oladapo OT, Awolude AO, Adewole FI.** 2015, Afr J Reprod Health, pp. 19: 52-62.

24. *Severity and cost of unsafe abortion complications treated in Nigerian hospitals.* **Henshaw SK, Adewole I, Singh S, Bakole A, Oye-Adreniran B, Hussain R.** 2008, Int Fam Plan Perspect, pp. 34:040-51.

25. *Abortion and health in Brazil: challenges to research within a context of illegality.* **Menezes, Greice M.S., et al.** 2020, Reports in Public Health, p. 36.
